# Supplementary material
Source: PubMed Central journal article supplement (PMC6227865)
Supplement: rsbl20180470supp1.pdf [file rsbl20180470supp1.pdf]

Water-repellent plant surface structure induced by gall-forming insects  
for waste management

Keigo Uematsu, Mayako Kutsukake, Takema Fukatsu

Table S1. Galls of aphids of the tribe Eriosomatini (subfamily: Eriosomatinae)  
on *Zelkova serrata* examined in this study.

| Species                                  | Collection locality <sup>1</sup>       | Collection date     |
|------------------------------------------|----------------------------------------|---------------------|
| <i>Colophina</i><br><i>clematis</i>      | Okutama, Tokyo<br>Shomaru, Saitama     | Jun 2016 - Jun 2018 |
| <i>Colophina</i><br><i>arma</i>          | Aki-Ota, Hiroshima                     | 22 Jul, 2016        |
| <i>Hemipodaphis</i><br><i>persimilis</i> | Sapporo, Hokkaido<br>Matsumoto, Nagano | Jul 2016 - Jun 2018 |
| <i>Paracolopha</i><br><i>morrisoni</i>   | Tsukuba, Ibaraki<br>Shomaru, Saitama   | 2 Jun, 2016         |

<sup>1</sup>All localities are in Japan.

Table S2. Statistical information reported in this study. Statistical significance was analyzed using linear mixed model (lmer function in the lme4 package) with gall identity treated as a random factor followed by Tukey's post-hoc test using *glht* function in the *multcomp* package in R version 3.4.3.

(a) Trichome density among different leaf areas (no. of trichomes / mm<sup>2</sup>)

|                                       | Mean difference<br>(left - right) | 95 % CI of the difference<br>(lower limit, upper limit) | z score | p-value  |
|---------------------------------------|-----------------------------------|---------------------------------------------------------|---------|----------|
| Inner gall vs. Hairy underside        | 18.6                              | -1.8, 38.9                                              | 2.34    | 0.089    |
| Inner gall vs. Normal underside       | 214.4                             | 194.1, 234.8                                            | 27.06   | < 0.0001 |
| Inner gall vs. Normal upperside       | 213                               | 192.6, 233.4                                            | 26.88   | < 0.0001 |
| Hairy underside vs. Normal underside  | 195.9                             | 175.5, 216.3                                            | 24.72   | < 0.0001 |
| Hairy underside vs. Normal upperside  | 194.4                             | 174.1, 214.8                                            | 24.54   | < 0.0001 |
| Normal upperside vs. Normal underside | 1.4                               | -18.9, 21.8                                             | 0.18    | 0.998    |

(b) Trichome length among different leaf areas (µm)

|                                       | Mean difference<br>(left - right) | 95 % CI of the difference<br>(lower limit, upper limit) | z score | p-value  |
|---------------------------------------|-----------------------------------|---------------------------------------------------------|---------|----------|
| Inner gall vs. Hairy underside        | -94.0                             | -110.4, -77.6                                           | -14.69  | < 0.0001 |
| Inner gall vs. Normal underside       | -2.8                              | -19.3, 13.7                                             | -0.43   | 0.973    |
| Inner gall vs. Normal upperside       | -11.4                             | -29.5, 6.7                                              | -1.61   | 0.370    |
| Hairy underside vs. Normal underside  | 91.2                              | 75.0, 107.4                                             | 14.46   | < 0.0001 |
| Hairy underside vs. Normal upperside  | 82.6                              | 64.9, 100.4                                             | 11.96   | < 0.0001 |
| Normal upperside vs. Normal underside | 8.6                               | -9.1, 26.2                                              | 1.25    | 0.597    |

(c) Distance between trichomes (µm)

|                                       | Mean difference<br>(left - right) | 95 % CI of the difference<br>(lower limit, upper limit) | z score | p-value  |
|---------------------------------------|-----------------------------------|---------------------------------------------------------|---------|----------|
| Inner gall vs. Hairy underside        | 4.2                               | -26.5, 34.9                                             | -14.69  | 0.985    |
| Inner gall vs. Normal underside       | -201.8                            | -232.7, -171.0                                          | -0.43   | < 0.0001 |
| Inner gall vs. Normal upperside       | -244.6                            | -279.0, -210.1                                          | -1.61   | < 0.0001 |
| Hairy underside vs. Normal underside  | -206.0                            | -235.4, -176.6                                          | 14.46   | < 0.0001 |
| Hairy underside vs. Normal upperside  | -248.7                            | -281.8, -215.7                                          | 11.96   | < 0.0001 |
| Normal upperside vs. Normal underside | 42.7                              | 9.5, 76.0                                               | 1.25    | 0.006    |

(d) Trichome length among the species (µm)

|                                             | Mean difference<br>(left - right) | 95 % CI of the difference<br>(lower limit, upper limit) | z score | p-value  |
|---------------------------------------------|-----------------------------------|---------------------------------------------------------|---------|----------|
| <i>C. clematis</i> vs. <i>C. arma</i>       | 16.9                              | -7.2, 41.0                                              | 1.637   | 0.227    |
| <i>H. persimilis</i> vs. <i>C. arma</i>     | -50.1                             | -77.0, -23.2                                            | -4.35   | < 0.0001 |
| <i>H. persimilis</i> vs. <i>C. clematis</i> | -67.0                             | -87.1, -46.9                                            | -7.778  | < 0.0001 |

(e) Trichome density among the species (no. of trichomes / mm<sup>2</sup>)

|                                             | Mean difference<br>(left - right) | 95 % CI of the difference<br>(lower limit, upper limit) | z score | p-value  |
|---------------------------------------------|-----------------------------------|---------------------------------------------------------|---------|----------|
| <i>C. clematis</i> vs. <i>C. arma</i>       | -31.4                             | -97.1, 34.4                                             | -1.12   | 0.502    |
| <i>H. persimilis</i> vs. <i>C. arma</i>     | -138.7                            | -208.8, -68.6                                           | -4.62   | < 0.0001 |
| <i>H. persimilis</i> vs. <i>C. clematis</i> | -107.3                            | -161.6, -53.0                                           | -4.62   | < 0.0001 |

(f) Contact angle among different plant surfaces

|                                      | Mean difference<br>(left - right) | 95 % CI of the difference<br>(lower limit, upper limit) | z score | p-value  |
|--------------------------------------|-----------------------------------|---------------------------------------------------------|---------|----------|
| Normal underside vs. Inner gall      | -68.6                             | -76.1, -61.2                                            | -21.58  | < 0.0001 |
| Hairy underside vs. Inner gall       | -22.1                             | -29.0, -15.3                                            | -7.577  | < 0.0001 |
| Hairy underside vs. Normal underside | 46.5                              | 39.1, 53.9                                              | 14.701  | < 0.0001 |
