# Supplementary material
Source: PubMed Central journal article supplement (PMC6227865)
Supplement: rsbl20180470supp2.pdf [file rsbl20180470supp2.pdf]

Supplementary figures

# **Water-repellent plant surface structure induced by gall-forming insects for waste management**

Keigo Uematsu, Mayako Kutsukake, Takema Fukatsu

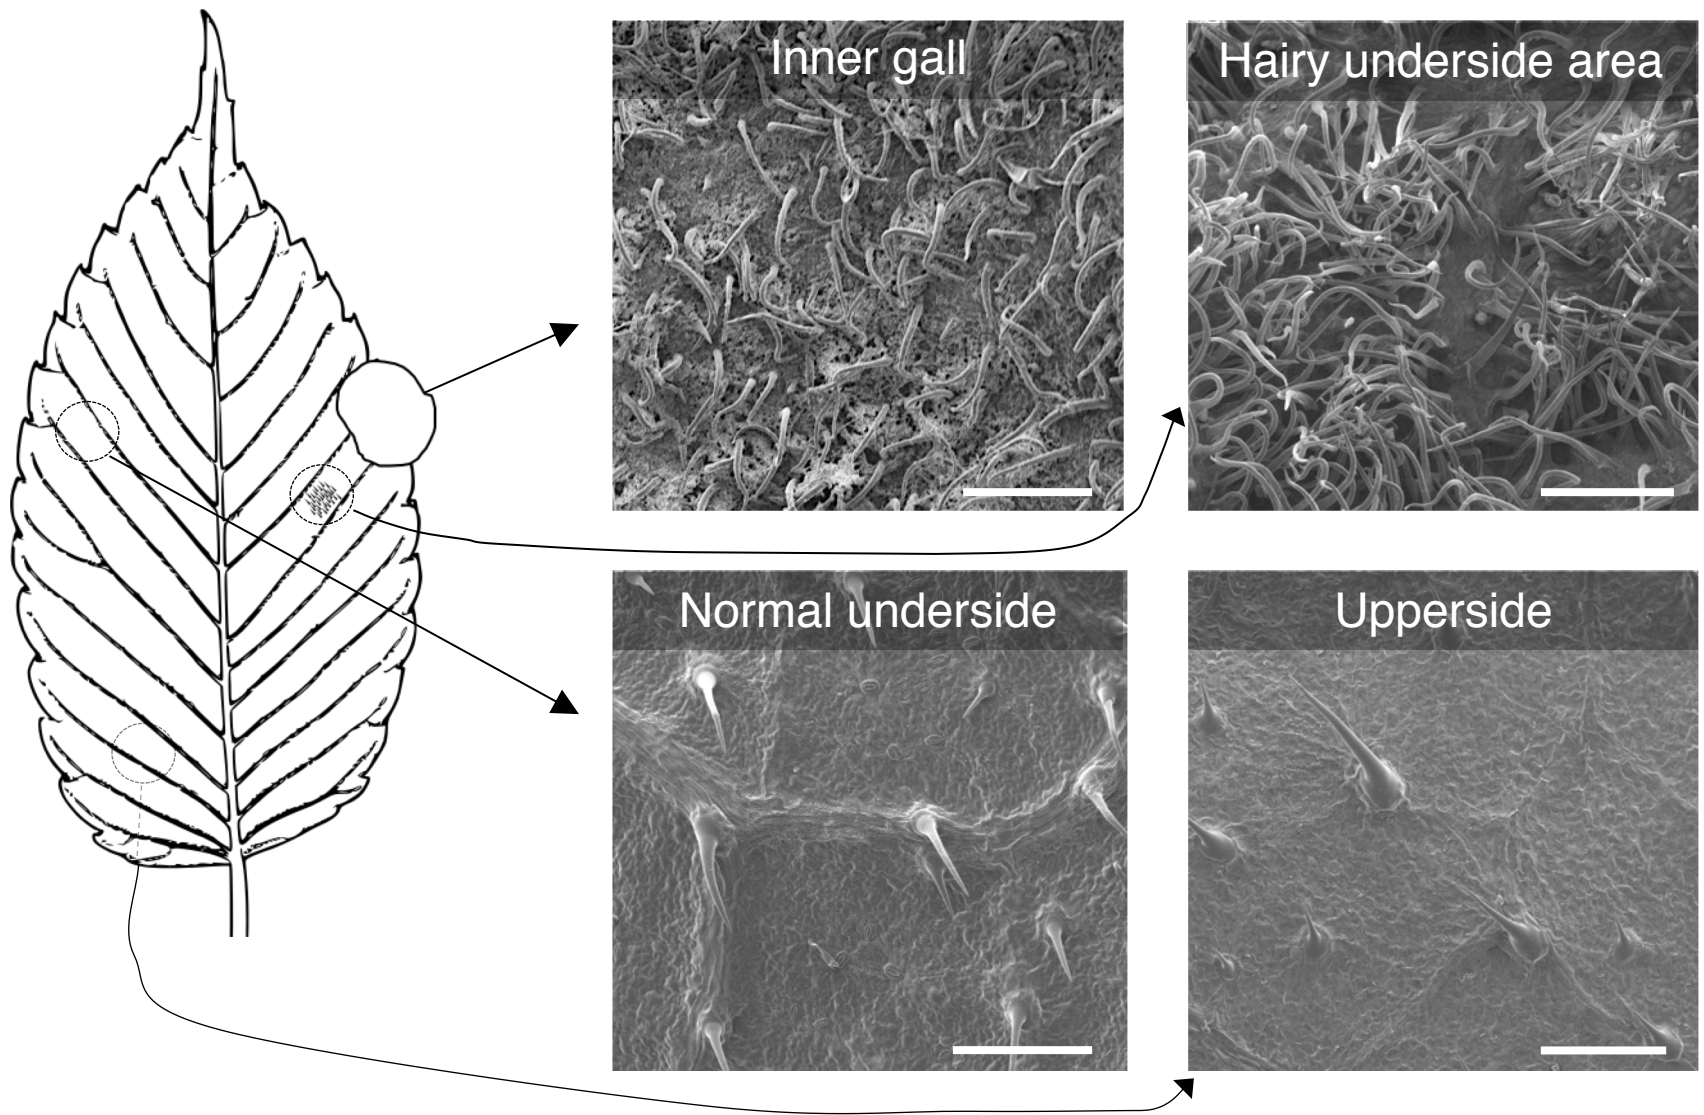

**Figure S1.**

Leaf areas and corresponding SEM figures on the underside of a *Z. serrata* leaf harbouring a *C. clematis* gall. Scale bars indicate 200  $\mu\text{m}$ .

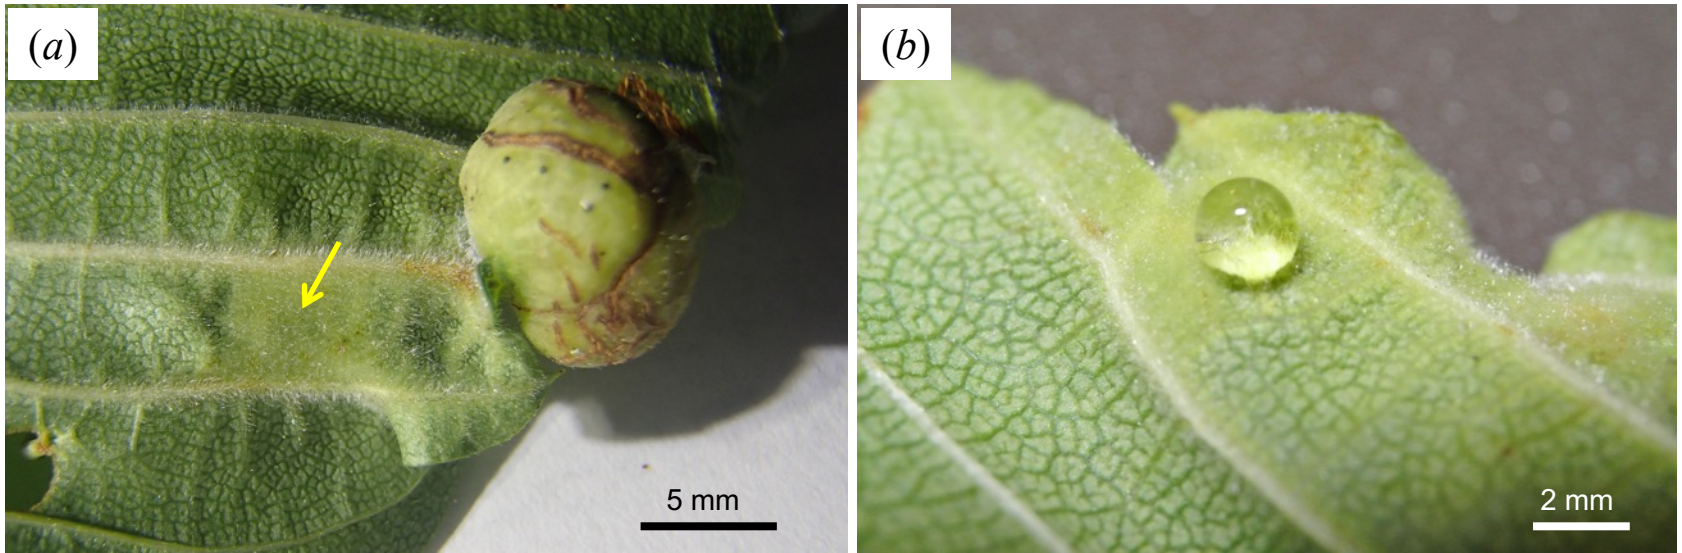

**Figure S2.**

Hairy areas on the *Z. serrata* leaf harbouring a *C. clematis* gall. (a) An underside area covered with dense trichomes (arrow). (b) A water droplet placed on the hairy area.

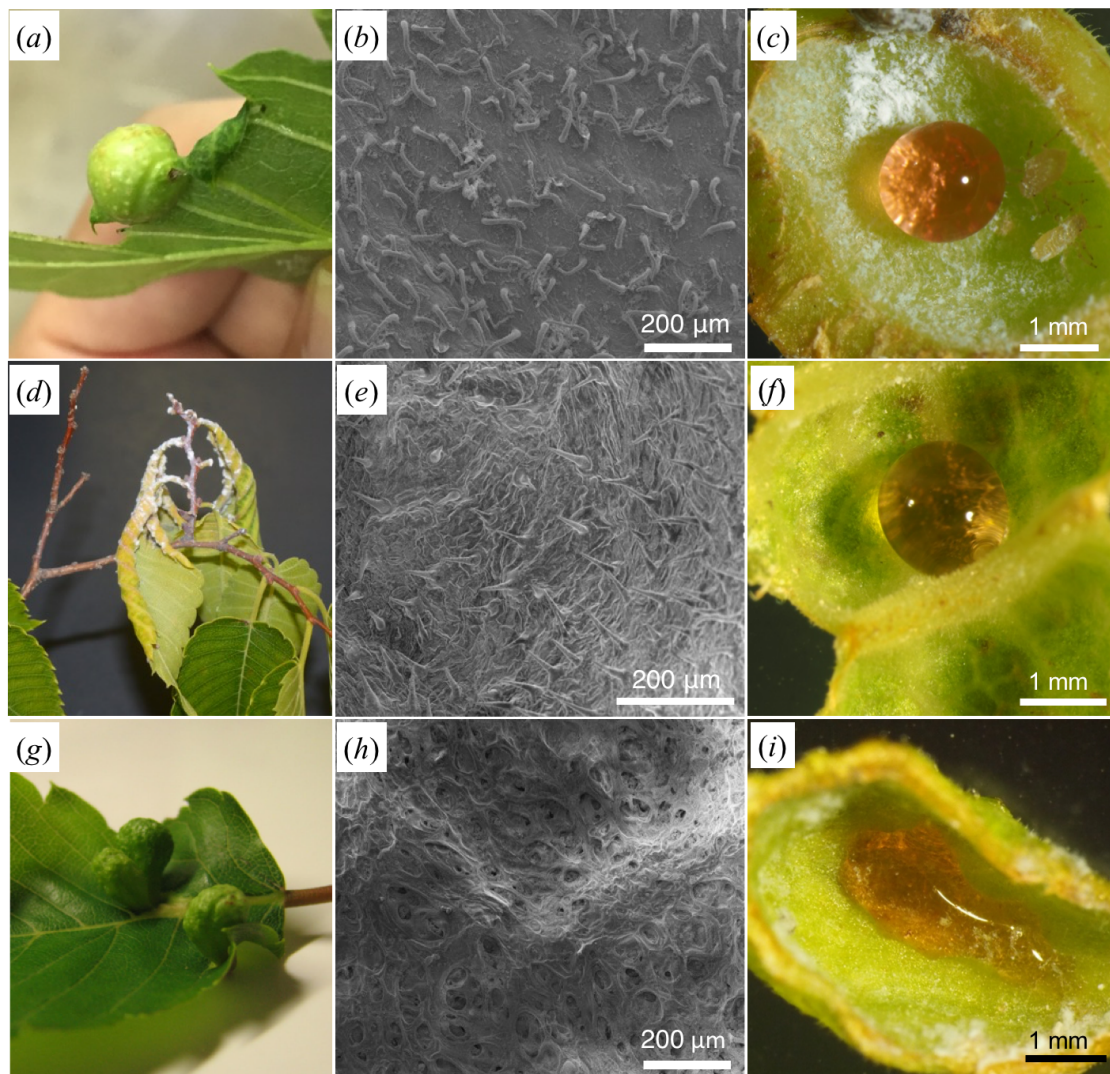

### Figure S3.

Galls of Eriosomatini aphids on *Zelkova serrata*: *Colophina arma* (a,b), *Colophina clematis* (c), *Hemipodaphis persimilis* (d-f), and *Paracolopha morrisoni* (g-i). (a,d,g) Mature galls; (b,e,h) inner gall surfaces; (c,f,i) food-dye solution on gall inner surfaces.
